# Supplementary material for: Correlates of HIV-1 control after combination immunotherapy
Source: Nature. 2025 Dec 1;650(8100):187–95. doi: 10.1038/s41586-025-09929-5 (PMC12872443; doi:10.1038/s41586-025-09929-5)
Supplement: Supplementary file 9 — Correlation analyses (two-sided Spearman’s test): pre-ATI viral reservoir and HIV-specific T cell measurements versus post-ART set points. [file 41586_2025_9929_MOESM9_ESM.xlsx]

## Sheet: Sheet1
Var1_at_PreATI	Var2	Spearman_rho	p_value
LLTR_million	setpoint	0.501195	0.116293
TAR_million	setpoint	0.438095	0.177746
ShearCorrected_Intact_RPP30	setpoint	-0.22725	0.556514
CE_IFNg_CD4	setpoint	-0.390476	0.235105
CE_IFNg_CD8	setpoint	0.504762	0.113301
Total_IFNg_CD4	setpoint	-0.32381	0.331343
Total_IFNg_CD8	setpoint	0.0285714	0.933543
