# Supplementary material for: Correlates of HIV-1 control after combination immunotherapy
Source: Nature. 2025 Dec 1;650(8100):187–95. doi: 10.1038/s41586-025-09929-5 (PMC12872443; doi:10.1038/s41586-025-09929-5)
Supplement: Supplementary file 10 — Flow and mass cytometry panels. [file 41586_2025_9929_MOESM10_ESM.xlsx]

## Sheet: CyTOF_Panel_1
	Antigen	Metal	Clone	Vendor	Catalog number	[Ab] (mg/mL or vol/100uL if Fluidigm)
1	CD45	89	HI30 (3089003B)	Fluidigm	3089003B	0.5
2	CD11b	115	ICRF44	Biolegend	301302	0.2
3	CD3	141	UCHT1	Biolegend	300402	0.5
4	CD19	142	H1B19	Biolegend	302202	0.5
5	CD69	143	FN50	Biolegend	310902	0.25
6	CD123	144	6H6	Biolegend	306002	0.5
7	CD4	145	RPA-T4	Biolegend	300502	0.5
8	CD8	146	RPA-T8	Biolegend	301002	0.5
9	CD11c	147	Bu15	Biolegend	337202	0.5
10	CD20	148	2H7	Biolegend	302302	0.2
11	CD138	149	DL-101	Biolegend	352302	0.5
12	CD14	150	M5E2	Biolegend	301802	0.5
13	CD21	151	Bu32	Biolegend	313502	0.5
14	CXCR3	152	G025H7	Biolegend	353733	0.2
15	CD45RA	153	HI100	Biolegend	304102	0.5
16	CD40	154	5C3	Biolegend	334302	0.5
17	PDL1	156	29E.2A3	Biolegend	329702	0.5
18	CD68	157	Y1/82A	Biolegend	333802	0.5
19	CD27	158	O323	Biolegend	302802	0.5
20	CCR2	159	K036C2	Biolegend	357202	0.5
21	TBET	160	4B10	Biolegend	644802	0.5
22	CD303	161	201A	Biolegend	354202	0.5
23	CD80	162	L307.4	BD	557223	0.2
24	CD86	163	IT2.2	Biolegend	305401	0.5
25	CX3CR1	164	2A9-1	Biolegend	341602	0.5
26	CD24	165	MI5	Biolegend	311102	0.5
27	CD141	166	AD5-14H12	Miltenyi	130-108-033	0.5
28	CD38	167	HIT2	Fluidigm	3167001B	1
29	Ki67	168	B56	Fluidigm	3168007B	1
30	CD71	169	CY1G4	Biolegend	334102	0.5
31	IgD	170	IA6-2	Biolegend		0.3
32	CXCR5	171	RF8B2 (3171014B)	Fluidigm	3171014B	0.125
33	BDCA1	172	L161	Biolegend	331502	0.3
34	IgM	173	MHM-88	Biolegend	314502	0.5
35	HLADR	174	L243	Biolegend	307602	0.5
36	PD1	175	EH12.2H7	Biolegend	329902	0.3
37	CD56	176	HCD56 (3176008B)	Fluidigm	3176008B	0.5
38	CD16	209	3G8 (3209002B)	Fluidigm	3209002B	0.5

## Sheet: CyTOF_Panel_2
	Antigen	Metal	Clone	Vendor	Catalog number	[Ab] (mg/mL or vol/100uL if Fluidigm)
1	CD45	89	HI30 (3089003B)	Fluidigm	3089003B	0.5
2	CD14	113	M5E2	Biolegend	301802	0.3
3	GzB	115	GB11	Biorad	MCA2120	0.2
4	CD3	141	UCHT1	Biolegend	300402	0.5
5	CD19	142	H1B19	Biolegend	302202	0.5
6	CD69	143	FN50	Biolegend	310902	0.25
7	CD38	144	HIT2	Fluidigm	3144014B	0.5
8	CD4	145	RPA-T4	Biolegend	300502	0.5
9	CD8	146	RPA-T8	Biolegend	301002	0.5
10	GzA	148	CB9	Biolegend	507202	0.2
11	CX3CR1	149	2A9-1	Biolegend	341602	0.5
12	CD95	150	DX2	Biolegend	305602	0.5
13	ICOS	151	C398.4A	Biolegend	313539	0.5
14	gdTCR	152	11F2 (3152008B)	Fluidigm	3152008B	0.5
15	CD45RA	153	HI100	Biolegend	304102	0.5
16	CD28	154	CD28.2	Biolegend	302902	0.5
17	CD39	155	A1	Biolegend	328202	0.2
18	Perforin	156	B-D48	Abcam	Ab7225	0.2
19	CD27	158	O323	Biolegend	302802	0.5
20	TCF1	159	7F11A10	Biolegend	655202	0.2
21	TBET	160	4B10	Biolegend	644802	0.5
22	CTLA4	161	14D3 (3161004B)	Fluidigm	3161004B	0.25
23	FOXP3	162	PCH101 (3162011a)	Fluidigm	3162011a	0.25
24	CXCR3	163	G02H7	Biolegend	353702	0.5
25	EOMES	164	WD1928	ThermoFisher	14-4877-82	0.5
26	CD127	165	A019D5	Biolegend	351302	0.5
27	TIGIT	166	A15153G	Biolegend	372702	0.5
28	CCR7	167	G043H7	Biolegend	353202	0.5
29	Ki67	168	B56	Fluidigm	3168007B	1
30	CD25	169	2A3 (3169003B)	Fluidigm	3169003B	1
31	CXCR5	171	RF8B2 (3171014B)	Fluidigm	3171014B	0.125
32	Bcl2	172	100	Biolegend	658702	0.5
33	CD103	173	Bcr-ACT8	Biolegend	350202	0.2
34	HLADR	174	L243	Biolegend	307602	0.5
35	PD1	175	EH12.2H7	Biolegend	329902	0.3
36	CD56	176	HCD56 (3176008B)	Fluidigm	3176008B	0.5
37	CD16	209	3G8 (3209002B)	Fluidigm	3209002B	0.5

## Sheet: ICS_panel
	Ag	Fluor	Clone	Raised in	Mfg.	Cat #	Dil	Reference
1	CD45RA	BUV395	5H9	Mu	BD	740315	300	Beads
2	Zombie UV		-	NA	Biolegend	423107	500	50% dead cells
3	CX3CR1	BUV563	2A9-1	Rat	BD	749357	40	Beads
4	CD27	BUV805	M-T271	Mu	BD	742012	80	Beads
5	CD14-Dump	BV510	M5E2	Mu	Biolegend	301842	50	Beads
5	CD19-Dump	BV510	HIB19	Mu	Biolegend	302242	50	Beads
5	TCRgd-Dump	BV510	B1	Mu	Biolegend	331220	50	Beads
6	CD8	BV570	RPA-T8	Mu	Biolegend	301037	200	Beads
7	CD39	BV605	A1	Mu	Biolegend	328236	100	Beads
8	CD103	BV650	Ber-ACT8	Mu	BD	743653	50	Beads
9	CXCR5	BV750	RF8B2	Rat	BD	747111	200	Beads
10	PD-1	BV785	EH12.2H7	Mu	Biolegend	329929	20	Beads
11	TIGIT	PerCP-eFluor710	MBSA43	Mu	Thermo	46-9500-42	20	Beads
12	CXCR3	PE-CF594	1C6	Mu	BD	562451	40	Beads
13	CD95	PE-Cy5	DX2	Mu	Biolegend	305610	200	Beads
14	CCR7 (CD197)	PE-Cy7	G043H7	Mu	Biolegend	353226	100	Beads
15	CD4	SparkNIR685	SK3	Mu	Biolegend	344657	100	Beads
16	CD127	APC-f750	A019D5	Mu	Biolegend	351349	20	Beads
17	MIP1-b	BV421	D21-1351	Mu	BD	562900	1000	Beads
18	IFN-g	eF450	4S.B3	Mu	Thermo	48-7319-42	1000	Beads
19	CD3	BV480	UCHT-1	Mu	BD	566105	1000	Beads
20	IL-2	BV711	MQ1-17H12	Rat	Biolegend	500345	200	Beads
21	Perforin	PerCP-Cy5.5	B-D48	Mu	Biolegend	353314	40	Beads
22	Granzyme B	PE-Cy5.5	GB11	Mu	Thermo	GRB18	4000	Beads
23	TNFa	R718	Mab11	Mu	BD	557996	4000	Beads
24	Tbet	A488	4B10	Mu	Biolegend	644829	2000	Beads
25	TCF1	PE	7F11A10	Mu	Biolegend	655207	200	Beads
26	TOX	APC		Mu	Miltenyi	130-118-335	100	Slingbeads
27	CD107a	RY586	H4A3	Mu	BD	568484	2000	Beads

## Sheet: CTV_panel
	Ag	Fluor	Clone	Raised in	Mfg.	Cat #	Dil	Reference
1	CTV	BV421	NA	NA	Thermo	C34557	0.5 uM	cells
2	Zombie UV	NA	NA	NA	Biolegend	423107	500	50% dead cells
3	CD14-Dump	BV510	M5E2	Mu	Biolegend	301842	200	Beads
3	CD19-Dump	BV510	HIB19	Mu	Biolegend	302242	200	Beads
3	TCRgd-Dump	BV510	B1	Mu	Biolegend	331220	200	Beads
4	CD8	APC-R700	SK1	Mu	BD	565192	100	Beads
5	PD-1	PE	EH12.2H7	Mu	Biolegend	329929	50	Beads
6	CD45RA	APC-Cy7	HI100	Mu	Biolegend	304128	300	Beads
7	CCR7 (CD197)	BV785	G043H7	Mu	Biolegend	353230	50	Beads
8	CD4	BV711	OKT4	Mu	Biolegend	317440	100	Beads
9	CD3	BV650	SK7	Mu	BD	563999	1000	Beads
10	Perforin	PE-Cy7	B-D48	Mu	Biolegend	353314	40	Beads
11	Granzyme B	FITC	GB11	Mu	Biolegend	GRB18	200	Beads
